## Corrigendum to: Cross Validation of the Prodromal Questionnaire 16-Item Version in an Adolescent Help-Seeking Population

Yvonne de Jong<sup>\*1,2,☉</sup>, Cornelis L. Mulder<sup>1,2</sup>, Albert Boon<sup>1,3</sup>, Elias Coenders<sup>1</sup>, and Mark van der Gaag<sup>1,4</sup>

<sup>1</sup>Parnassia Psychiatric Institute, Rotterdam and The Hague, the Netherlands; <sup>2</sup>Department of Psychiatry, Epidemiological and Psychiatric Research Institute, Rotterdam, Erasmus MC, the Netherlands; <sup>3</sup>Department of Child and Adolescent Psychiatry, Curium-Leiden University Medical Center, Oegstgeest, the Netherlands; <sup>4</sup>Department of Clinical Psychology, Vrije Universiteit, Amsterdam, the Netherlands

\*To whom correspondence should be addressed; Psychosis Early Detection and Intervention Team, Dynamostraat 18, 3083AK Rotterdam, the Netherlands; tel: +00-31-(0)88-3585348, e-mail: [Y.deJong@parnassiegroep.nl](mailto:Y.deJong@parnassiegroep.nl)

Corrigendum to “Cross Validation of the Prodromal Questionnaire 16-Item Version in an Adolescent Help-Seeking Population” by Yvonne de Jong et al. *Schizophrenia Bulletin Open*, Volume 1, Issue 1, January 2020, sgaa033, doi:10.1093/schizbullopen/sgaa033.

In this paper, all ROC analyses were performed using SPSS version 25.0. When performing ROC analyses, SPSS produces an output with cutoff values that are the averages of two consecutive ordered observed test values. When this paper first published, these cutoff values were not rounded up and the sensitivity and

specificity scores in the same line were therefore given a lower cutoff score than they should have received. This article has now been corrected so that all cutoffs found and described have been increased with one point. The sensitivity and specificity scores in the tables and supplement have also been corrected accordingly (moving down one line). The conclusions of the article correspond to the previously stated conclusions. A cutoff of seven or more agreed items was chosen, but some text changes due to the altered screening values were necessary.

**Table 2.** Screening Properties of the PQ-16, Comprehensive Assessment of At-Risk Mental States (CAARMS) Diagnosis of UHR or Psychotic Threshold vs No CAARMS Diagnosis, Using Method A

| PQ-16 Cutoff                | Sensitivity | Specificity | PPV         | NPV         | True Positives | True Negatives | False Positives | False Negatives |
|-----------------------------|-------------|-------------|-------------|-------------|----------------|----------------|-----------------|-----------------|
| Total group, <i>n</i> = 325 |             |             |             |             |                |                |                 |                 |
| 5                           | 0.97        | 0.18        | 46.2        | 89.7        | 132            | 35             | 154             | 4               |
| 6                           | 0.93        | 0.25        | 47.1        | 82.5        | 126            | 47             | 142             | 10              |
| <b>7</b>                    | <b>0.85</b> | <b>0.42</b> | <b>51.3</b> | <b>79.8</b> | <b>116</b>     | <b>79</b>      | <b>110</b>      | <b>20</b>       |
| <b>8</b>                    | <b>0.77</b> | <b>0.55</b> | <b>55.3</b> | <b>77.0</b> | <b>105</b>     | <b>104</b>     | <b>85</b>       | <b>31</b>       |
| 9                           | 0.65        | 0.69        | 60.5        | 73.6        | 89             | 131            | 58              | 47              |
| 10                          | 0.51        | 0.81        | 65.7        | 69.5        | 69             | 153            | 36              | 67              |
| Girls, <i>n</i> = 217       |             |             |             |             |                |                |                 |                 |
| 5                           | 0.98        | 0.16        | 50.8        | 90.0        | 100            | 18             | 97              | 2               |
| 6                           | 0.92        | 0.23        | 51.4        | 76.5        | 94             | 26             | 89              | 8               |
| 7                           | 0.87        | 0.38        | 55.6        | 77.2        | 89             | 44             | 71              | 13              |
| <b>8</b>                    | <b>0.78</b> | <b>0.55</b> | <b>60.3</b> | <b>73.3</b> | <b>79</b>      | <b>63</b>      | <b>52</b>       | <b>23</b>       |
| 9                           | 0.70        | 0.70        | 67.0        | 72.1        | 71             | 80             | 35              | 31              |
| 10                          | 0.55        | 0.83        | 73.7        | 67.4        | 56             | 95             | 20              | 46              |
| Boys, <i>n</i> = 108        |             |             |             |             |                |                |                 |                 |
| 5                           | 0.94        | 0.23        | 36.0        | 89.5        | 32             | 17             | 57              | 2               |
| 6                           | 0.94        | 0.28        | 37.7        | 91.3        | 32             | 21             | 53              | 2               |
| 7                           | 0.79        | 0.47        | 40.9        | 83.3        | 27             | 35             | 39              | 7               |
| <b>8</b>                    | <b>0.77</b> | <b>0.55</b> | <b>44.1</b> | <b>83.7</b> | <b>26</b>      | <b>41</b>      | <b>33</b>       | <b>8</b>        |
| 9                           | 0.53        | 0.69        | 43.9        | 76.1        | 18             | 51             | 23              | 16              |
| 10                          | 0.38        | 0.78        | 44.8        | 73.4        | 13             | 58             | 16              | 21              |

*Note:* Bold values represent the selected cutoff. NPV, negative predictive values; PPV, positive predictive values; PQ-16, Prodromal Questionnaire 16-item version; UHR, ultra-high risk.

**Table 3.** Comparison of Cutoff Scores With the Best Values in Scoring Methods B and C by Including Distress, per Gender and in the Total Group

| PQ-16 Cutoff          | Sensitivity | Specificity | PPV         | NPV         | True Positives | True Negatives | False Positives | False Negatives |
|-----------------------|-------------|-------------|-------------|-------------|----------------|----------------|-----------------|-----------------|
| Method B              |             |             |             |             |                |                |                 |                 |
| Total group $n = 324$ |             |             |             |             |                |                |                 |                 |
| 5                     | .89         | .37         | 50.2        | 82.4        | 120            | 70             | 119             | 15              |
| 6                     | .79         | .47         | 51.4        | 75.9        | 107            | 88             | 101             | 28              |
| <b>7</b>              | <b>.70</b>  | <b>.62</b>  | <b>56.6</b> | <b>74.1</b> | <b>94</b>      | <b>117</b>     | <b>72</b>       | <b>41</b>       |
| 8                     | .55         | .73         | 59.7        | 69.5        | 74             | 139            | 50              | 61              |
| Boys $n = 108$        |             |             |             |             |                |                |                 |                 |
| 4                     | .88         | .32         | 37.5        | 85.7        | 30             | 24             | 50              | 4               |
| 5                     | .79         | .42         | 38.6        | 81.6        | 27             | 31             | 43              | 7               |
| <b>6</b>              | <b>.68</b>  | <b>.54</b>  | <b>40.4</b> | <b>78.4</b> | <b>23</b>      | <b>40</b>      | <b>34</b>       | <b>11</b>       |
| 7                     | .53         | .66         | 41.9        | 75.4        | 18             | 49             | 25              | 16              |
| Girls $n = 216$       |             |             |             |             |                |                |                 |                 |
| 5                     | .92         | .34         | 55.0        | 83.0        | 93             | 39             | 76              | 8               |
| 6                     | .83         | .42         | 55.6        | 73.8        | 84             | 48             | 67              | 17              |
| <b>7</b>              | <b>.75</b>  | <b>.59</b>  | <b>61.8</b> | <b>73.1</b> | <b>76</b>      | <b>68</b>      | <b>47</b>       | <b>25</b>       |
| 8                     | .58         | .73         | 65.6        | 66.7        | 59             | 84             | 31              | 42              |
| Method C              |             |             |             |             |                |                |                 |                 |
| Total group $n = 324$ |             |             |             |             |                |                |                 |                 |
| 7                     | .88         | .38         | 50.4        | 81.8        | 119            | 72             | 117             | 16              |
| 8                     | .84         | .45         | 52.3        | 80.2        | 114            | 85             | 104             | 21              |
| <b>9</b>              | <b>.80</b>  | <b>.54</b>  | <b>55.7</b> | <b>79.2</b> | <b>108</b>     | <b>103</b>     | <b>86</b>       | <b>27</b>       |
| 10                    | .73         | .59         | 56.0        | 75.2        | 98             | 112            | 77              | 37              |
| Boys $n = 108$        |             |             |             |             |                |                |                 |                 |
| 7                     | .71         | .43         | 36.4        | 76.2        | 24             | 32             | 42              | 10              |
| 8                     | .68         | .46         | 36.5        | 75.6        | 23             | 34             | 40              | 11              |
| <b>9</b>              | <b>.65</b>  | <b>.57</b>  | <b>40.7</b> | <b>77.8</b> | <b>22</b>      | <b>42</b>      | <b>32</b>       | <b>12</b>       |
| 10                    | .59         | .63         | 42.6        | 77.0        | 20             | 47             | 27              | 14              |
| Girls $n = 216$       |             |             |             |             |                |                |                 |                 |
| 7                     | .94         | .35         | 55.9        | 87.0        | 95             | 40             | 75              | 6               |
| 8                     | .90         | .44         | 58.7        | 83.6        | 91             | 51             | 64              | 10              |
| <b>9</b>              | <b>.85</b>  | <b>.53</b>  | <b>61.4</b> | <b>80.3</b> | <b>86</b>      | <b>61</b>      | <b>54</b>       | <b>15</b>       |
| 10                    | .77         | .56         | 60.9        | 73.9        | 78             | 65             | 50              | 23              |

Note: For more cutoffs and screening values see supplementary material. NPV, negative predictive values; PPV, positive predictive values; PQ-16, Prodromal Questionnaire 16-item version.
